# Supplementary material for: Compatibility between agendas for improving human development and wildlife conservation outside protected areas: Insights from 20 years of data
Source: PubMed Central journal article supplement (PMC8641387; doi:10.1002/pan3.10041), 2019-08-01
Supplement: PAN3-1-305-s001.pdf [file PAN3-1-305-s001.pdf]

## **Supporting Information**

### **Compatibility between agendas for improving human development and wildlife conservation outside protected areas: insights from 20 years of data**

Judith M. Ament, Ben Collen, Chris Carbone, Georgina M. Mace, and Robin Freeman

Correspondence: [judith.ament@ioz.ac.uk](mailto:judith.ament@ioz.ac.uk); [robin.freeman@ioz.ac.uk](mailto:robin.freeman@ioz.ac.uk)

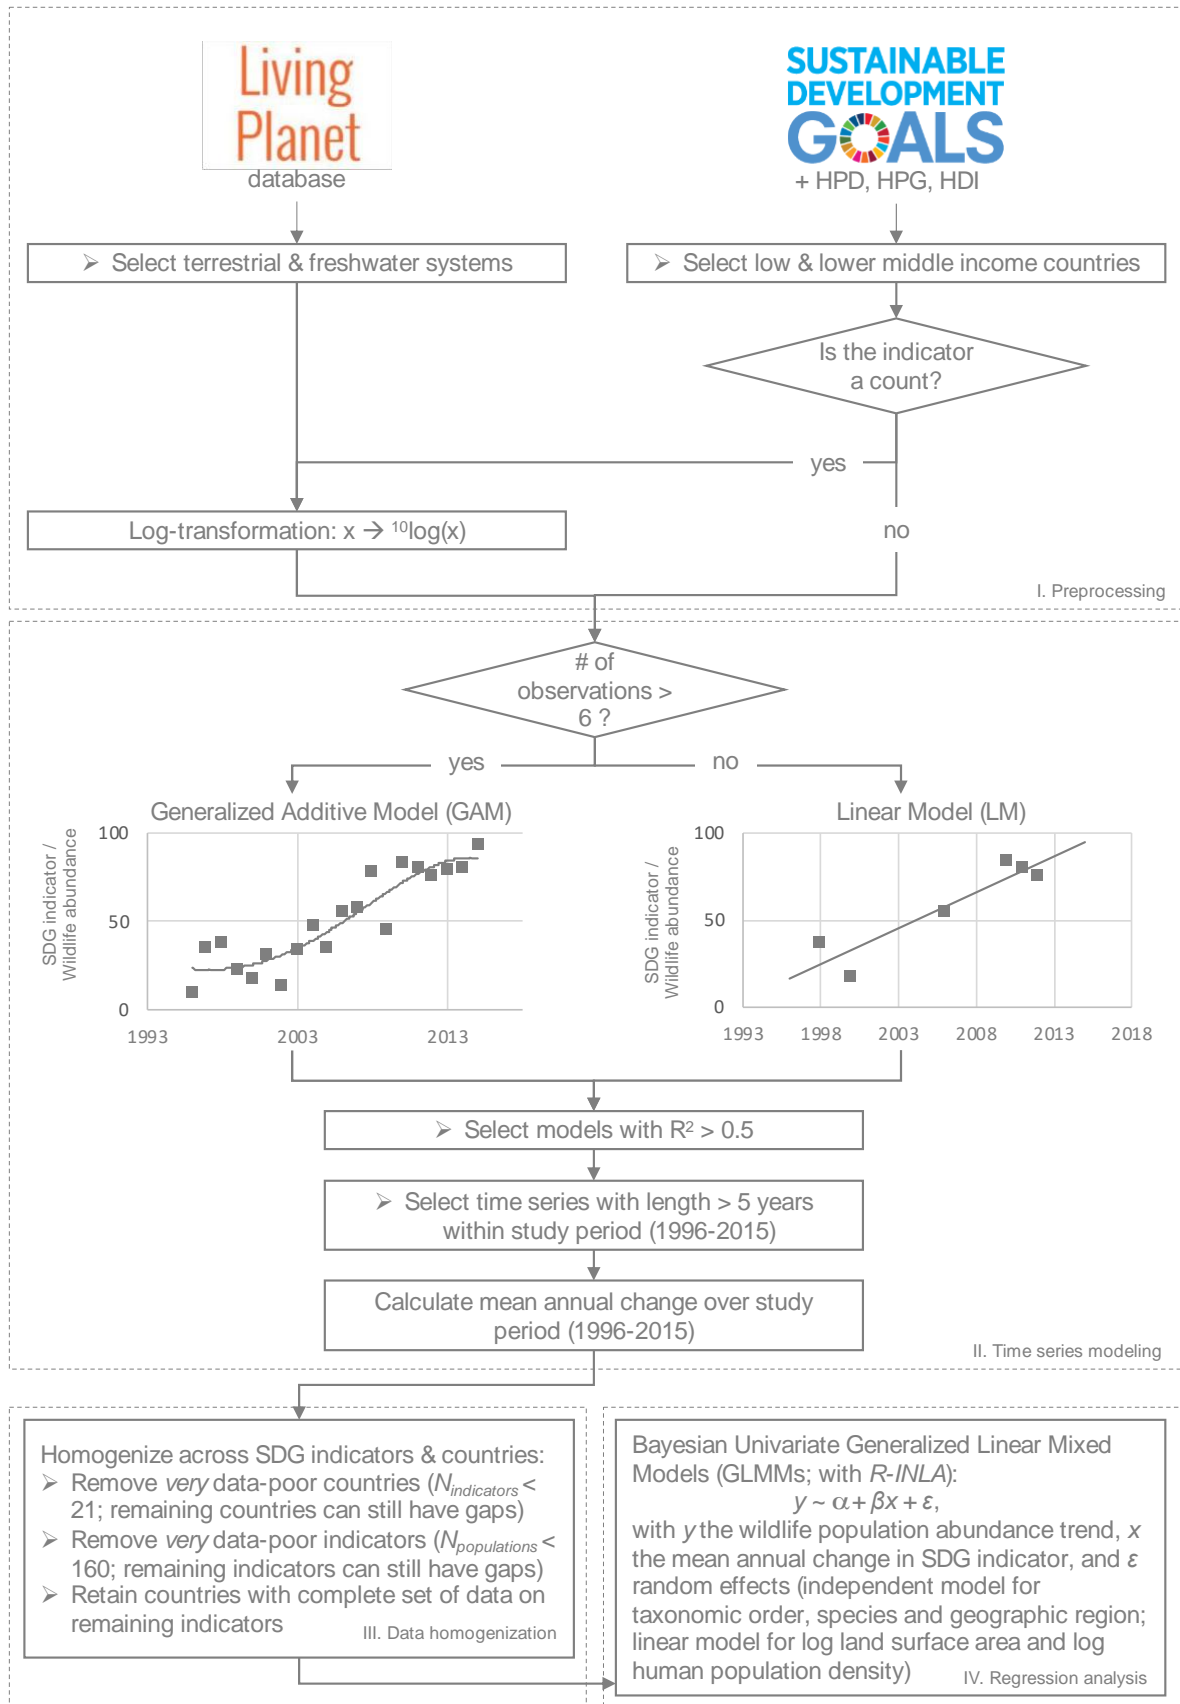

**Fig. S1.** Schematic representation of the data processing methodology employed in the study

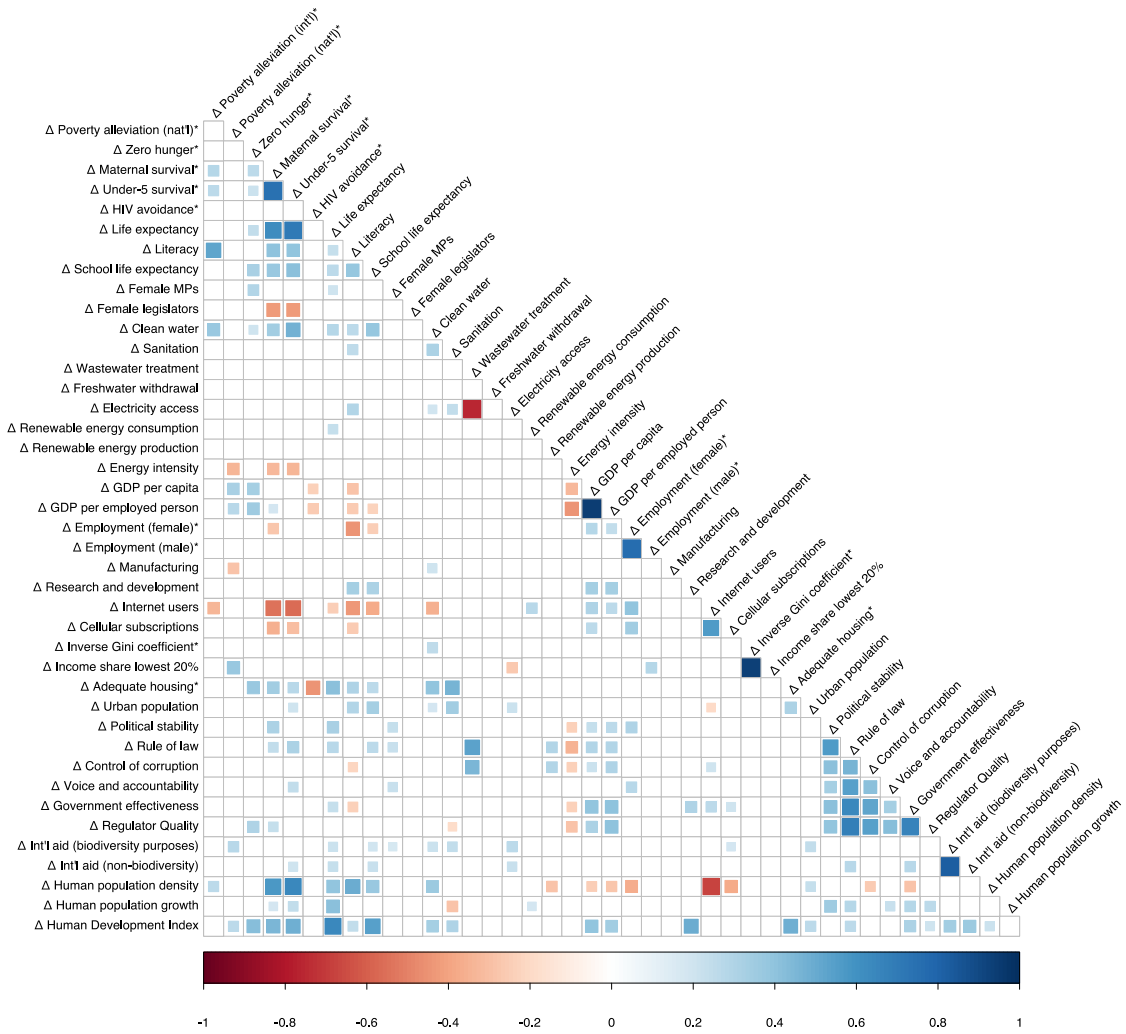

**Fig. S2.** Pearson correlations between changes in Sustainable Development Goal indicators between 1996 and 2015. Correlation strength indicated by size and shade of cells, showing positive (blue) and negative (red) correlations with  $p < 0.05$ . For indicator names appended with an asterisk the original indicator values were inverted (i.e., multiplied with -1), so that positive change signifies desirable progress towards the SDG.

a

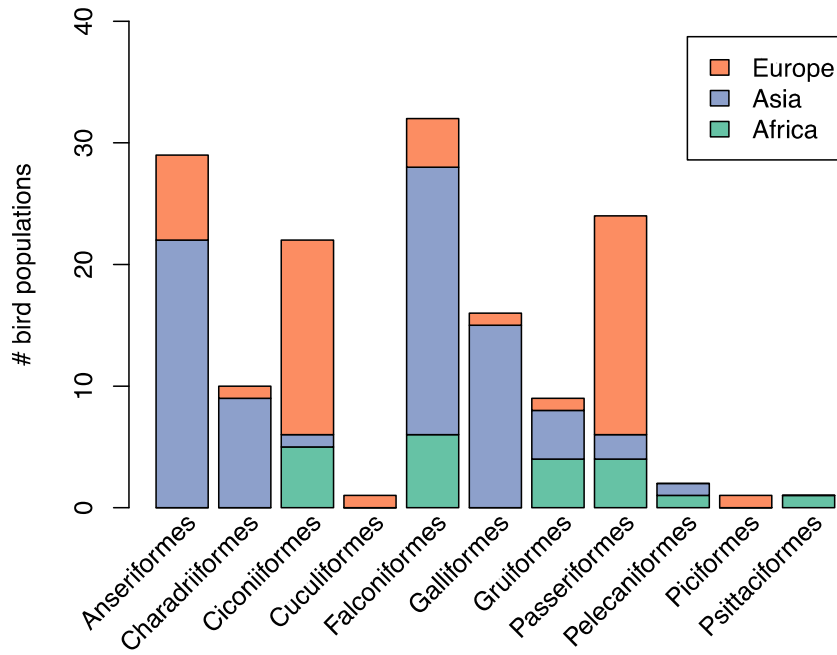

b

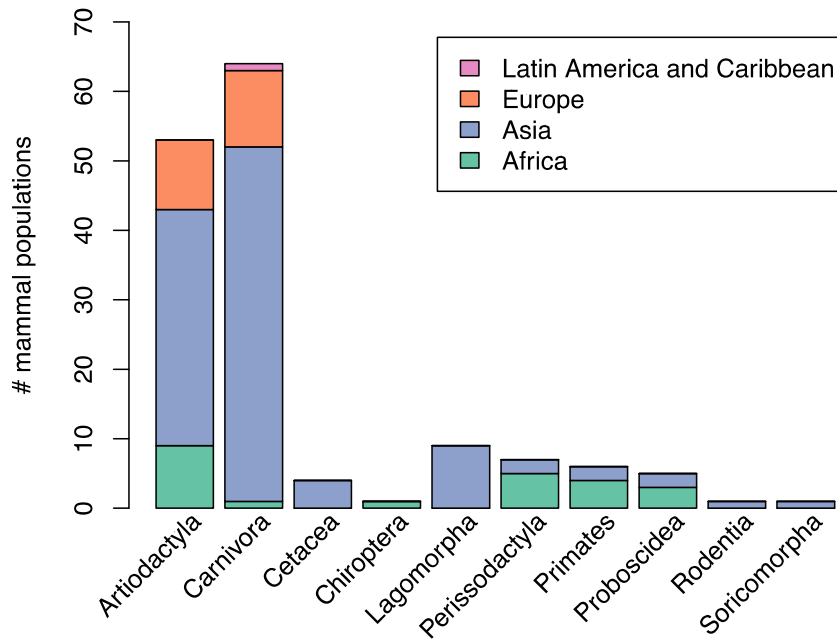

**Fig. S3.** Numbers of populations included in the analysis. Populations available by taxonomic order and geographic range for **a**, birds and **b**, mammals, from Latin America and the Caribbean (pink), Europe (orange), Asia (dark blue), and Africa (green).

**Table S1.** Countries included in the analyses.

| Countries          | In bird | In mammal |
|--------------------|---------|-----------|
| Albania            | ✓       | ✓         |
| Algeria            | ✓       | ✓         |
| Bangladesh         |         | ✓         |
| Belarus            |         | ✓         |
| Bulgaria           |         | ✓         |
| China              | ✓       | ✓         |
| Cote d'Ivoire      |         | ✓         |
| Estonia            | ✓       | ✓         |
| Ethiopia           |         | ✓         |
| Ghana              | ✓       |           |
| India              |         | ✓         |
| Iran, Islamic Rep. | ✓       |           |
| Indonesia          |         | ✓         |
| Kazakhstan         |         | ✓         |
| Latvia             |         | ✓         |
| Lesotho            | ✓       |           |
| Liberia            |         | ✓         |
| Lithuania          | ✓       | ✓         |
| Mali               |         | ✓         |
| Mozambique         | ✓       |           |
| Namibia            | ✓       | ✓         |
| Nepal              | ✓       |           |
| Pakistan           | ✓       | ✓         |
| Peru               |         | ✓         |
| Poland             | ✓       | ✓         |
| Romania            | ✓       |           |
| Russian Federation | ✓       | ✓         |
| Slovak Republic    | ✓       | ✓         |
| Tanzania           |         | ✓         |
| Turkey             | ✓       |           |
| Uganda             | ✓       | ✓         |
| Ukraine            | ✓       | ✓         |
| Zimbabwe           |         | ✓         |
